# Supplementary material for: Fourteen-day vonoprazan-based bismuth quadruple therapy for H. pylori eradication in an area with high clarithromycin and levofloxacin resistance: a prospective randomized study (VQ-HP trial)
Source: PubMed Central journal article supplement (PMC11026498; doi:10.1038/s41598-024-59621-3), 2024-04-18
Supplement: 41598_2024_59621_MOESM1_ESM.pdf [file 41598_2024_59621_MOESM1_ESM.pdf]

**Table S1:** Factors Associated with Successful Eradication in a Multivariate Analysis

| Variables           | Univariate analysis |               |         | Multivariate analysis |               |         |
|---------------------|---------------------|---------------|---------|-----------------------|---------------|---------|
|                     | OR                  | (95% CI)      | p-value | OR                    | (95% CI)      | p-value |
| Male gender         | 1.37                | (0.39 – 4.82) | 0.62    | 1.01                  | (0.26 – 4.56) | 0.897   |
| Age                 | 1.01                | (0.96 – 1.06) | 0.67    |                       |               |         |
| Diabetes            | 5.86                | (1.40 - 24.4) | 0.02    | 10.8                  | (1.71 – 68.0) | 0.07    |
| Hypertension        | 0.19                | (0.02 – 1.56) | 0.12    |                       |               |         |
| Smoking             | 0.46                | (0.05 – 3.87) | 0.48    |                       |               |         |
| Alcohol consumption | 0.65                | (0.13 – 3.22) | 0.59    |                       |               |         |
